# Supplementary material for: Identifying Human Genome-Wide CNV, LOH and UPD by Targeted Sequencing of Selected Regions
Source: PLoS One. 2015 Apr 28;10(4):e0123081. doi: 10.1371/journal.pone.0123081 (PMC4412667; doi:10.1371/journal.pone.0123081)
Supplement: S4 Table — (XLS) [file pone.0123081.s009.xls]

## Sheet: Table S4
Table S4. The performance of ICLU for detecting CNV with different depth on 15 real samples’ SeTRs data.
Sample		YH	HG00537	GM50178	GM50275	GM12959	GM11419	GM22364	GM05047	GM50142	GM12074	GM10922	GM10932	GM03623	GM05875	GM08696
Karyotype		46,XY	46,XX	46,XX,del(5)(p15.3)	46,XY,del(5)(p14)	46,XY,del(1)(q43)	49,XYYYY	46,XY,dup(15)(q11q12)	46,XY,dup(10)(q11.2q23.2)	46,XY,dup(18)(q21.2q22)	46,XY,del(16)(q22q23)	46,XY,del(3)(p25)	46,XY,del(8)(p23)	48,XXX,+18	46,XX,del(16)(p12p11.2)	46,XY,dup(18)(q21.3q12.1)
ICLU (TR=~42M)	Depth=55X~90X	46,XY	46,XX	46,XX,del(5)(p15.3)	46,XY,del(5)(p14)	46,XY,del(1)(q43q44)	49,XYYYY	46,XY,dup(15)(q11q12q13.1)	46,XY,dup(10)(q11.2q23.2)	46,XY,dup(18)(q21.2q22)	46,XY,del(16)(q22q23)	46,XY,del(3)(p25p26)	46,XY,del(8)(p23)	48,XXX,+18	46,XX,del(16)(p12p11.2)	46,XY,dup(18)(q21.3q12)
	Depth=~40X	46,XY	46,XX	46,XX,del(5)(p15.3)	46,XY,del(5)(p14)	46,XY,del(1)(q43q44)	49,XYYYY	46,XY,dup(15)(q11q12)	46,XY,dup(10)(q11.2q23.2)	46,XY,dup(18)(q21.2q22)	46,XY,del(16)(q22q23)	46,XY,del(3)(p25p26)	46,XY,del(8)(p23)	48,XXX,+18	46,XX,del(16)(p12p11.2)	46,XY,dup(18)(q21.3q12)
	Depth=~30X	46,XY	46,XX	46,XX,del(5)(p15.3)	46,XY,del(5)(p14)	46,XY,del(1)(q43q44)	49,XYYY	46,XY,dup(15)(q11q12)	46,XY,dup(10)(q11.2q23.2)	46,XY,dup(18)(q21.2q22)	46,XY,del(16)(q22q23)	46,XY,del(3)(p25p26)	46,XY,del(8)(p23)	48,XXX,+18	46,XX,del(16)(p12p11.2)	46,XY,dup(18)(q21.3q12)
	Depth=~20X	46,XY	46,XX	46,XX,del(5)(p15.3)	46,XY,del(5)(p14)	46,XY,del(1)(q43q44)	49,XYYYY	46,XY,dup(15)(q11q12)	46,XY,dup(10)(q11.2q23.2)	46,XY,dup(18)(q21.2q22)	46,XY,del(16)(q22q23)	46,XY,del(3)(p25p26)	46,XY,del(8)(p23)	48,XXX,+18	46,XX,del(16)(p12p11.2)	46,XY,dup(18)(q21.3q12)
	Depth=~10X	46,XY	46,XX	46,XX,del(5)(p15.3)	46,XY,del(5)(p14)	46,XY,del(1)(q43q44)	49,XYYYY	46,XY,dup(15)(q11q12q13.1)	46,XY,dup(10)(q11.2q23.2)	46,XY,dup(18)(q21.2q22)	46,XY,del(16)(q22q23)	46,XY,del(3)(p25p26)	46,XY,del(8)(p23)	48,XXX,+18	46,XX,del(16)(p12p11.2)	46,XY,dup(18)(q21.3q12)
	Depth=~8X	46,XY	46,XX	46,XX,del(5)(p15.3)	46,XY,del(5)(p14)	46,XY,del(1)(q43q44)	49,XYYYY	46,XY,dup(15)(q12q13.1)	46,XY,dup(10)(q11.2q23.2)	46,XY,dup(18)(q21.2q21.3q22)	46,XY,del(16)(q22q23)	46,XY,del(3)(p25p26)	46,XY,del(8)(p23)	48,XXX,+18	46,XX,del(16)(p12p11.2)	46,XY,dup(18)(q21q12)
	Depth=~7X	46,XY	46,XX	46,XX,del(5)(p15.3)	46,XY,del(5)(p14)	46,XY,del(1)(q43q44)	49,XYYYY	Null	46,XY,dup(10)(q11.2q23.1)	46,XY,dup(18)(q21.2q21.3q22)	46,XY,del(16)(q22q23)	46,XY,del(3)(p25p26)	46,XY,del(8)(p23)	47,XX,+18	46,XX,del(16)(p12p11.2)	46,XY,dup(18)(q21.2q12)
	Depth=~6X	46,XY	46,XX	46,XX,del(5)(p15.3)	46,XY,del(5)(p14)	46,XY,del(1)(q43q44)	49,XYYYY	Null	46,XY,dup(10)(q11.2)	46,XY,dup(18)(q21.2q21.3q22)	46,XY,del(16)(q22q23)	46,XY,del(3)(p25p26)	46,XY,del(8)(p23)	47,XX,+18	46,XX,del(16)(p12p11.2)	46,XY,dup(18)(q12)
	Depth=~5X	46,XY	46,XX	46,XX,del(5)(p15.3)	46,XY,del(5)(p14)	46,XY,del(1)(q44)	49,XYYYY	Null	46,XY,dup(10)(q11.2)	46,XY,dup(18)(q21.3)	46,XY,del(16)(q22q23)	46,XY,del(3)(p25p26)	46,XY,del(8)(p23)	48,XXX,+18	46,XX,del(16)(p12p11.2)	46,XY,dup(18)(q12.2q21.2q21.3)
